# Supplementary material for: Proxy Responses for Mass Drug Administration Coverage Surveys: The Trends and Biases When Others are Allowed to Respond
Source: PubMed Central journal article supplement (PMC8733507; doi:10.4269/ajtmh.21-0817), 2021-10-25
Supplement: tpmd210817.SD1.pdf [file tpmd210817.SD1.pdf]

## Supplemental File

**Model A:** Final model for proxy response status:

$$\begin{aligned}\text{Logit}(E(Y_{ijk}|b_{jk})) = & \beta_0 + \beta_1(\text{Eligibility Status})_{ijk} \\ & + \beta_2(\text{Older Age Category})_{ijk} \\ & + \beta_3(\text{Young Adult Age Category})_{ijk} \\ & + \beta_4(\text{Sex})_{ijk} \\ & + b_0(\text{PSU})_{jk} \\ & + b_1(\text{District})_k \\ & + e_{ijk}\end{aligned}$$

For  $i$  individuals in  $j$  primary sampling units of  $k$  districts, where  $Y_{ijk} = 1$  if the individual had a proxy response and 0 for self-response

**Model B:** Final model for drug coverage:

$$\begin{aligned}\text{Logit}(E(Y_{ijk}|b_{jk})) = & \beta_0 + \beta_1(\text{Proxy Response Status})_{ijk} \\ & + \beta_2(\text{Older Age Category})_{ijk} \\ & + \beta_3(\text{Young Adult Age Category})_{ijk} \\ & + \beta_4(\text{Sex})_{ijk} \\ & + b_0(\text{PSU})_{jk} \\ & + b_1(\text{District})_k \\ & + e_{ijk}\end{aligned}$$

For  $i$  individuals in  $j$  primary sampling units of  $k$  districts, where  $Y_{ijk} = 1$  if the individual is reported to have swallowed the drug, 0 if not.
